# Supplementary material
Source: PubMed Central journal article supplement (PMC4513641)
Supplement: NIHMS678261-supplement-Supp_Material.pdf [file NIHMS678261-supplement-Supp_Material.pdf]

**Data Supplement 1.** ICD-9-CM and common procedural terminology (CPT) codes for visit, procedure, and diagnostic test identification.

| <b>ICD-9-CM diagnostic code</b>                   | <b>Description</b>                                                          |
|---------------------------------------------------|-----------------------------------------------------------------------------|
| 270.0                                             | Disturbance of amino acid transport                                         |
| 274.11                                            | Uric acid nephrolithiasis                                                   |
| 592.0                                             | Calculus of kidney                                                          |
| 592.1                                             | Calculus of ureter                                                          |
| 592.9                                             | Urinary calculus, unspecified                                               |
| 788.0                                             | Flank pain                                                                  |
| <b>CPT codes for urgent intervention</b>          |                                                                             |
| 52332                                             | Cystourethroscopy, with insertion of indwelling ureteral stent              |
| 50392                                             | Introduction of catheter into renal pelvis for drainage, percutaneous       |
| 50393                                             | Introduction of ureteral catheter or stent into ureter through renal pelvis |
| <b>CPT codes for imaging and laboratory tests</b> |                                                                             |
| <u>Urinalysis</u>                                 |                                                                             |
| 81000                                             | Urinalysis by dip stick, with microscopy                                    |
| 81001                                             | Urinalysis, automated, with microscopy                                      |
| 81002                                             | Urinalysis, non-automated, without microscopy                               |
| 81003                                             | Urinalysis, automated, without microscopy                                   |
| 81007                                             | Urinalysis, bacteriuria screen                                              |
| 81015                                             | Urinalysis, microscopic only                                                |
| <u>Imaging</u>                                    |                                                                             |
| 72192                                             | CT pelvis without contrast                                                  |
| 72193                                             | CT pelvis with contrast                                                     |
| 74176                                             | CT abd/pelvis without contrast                                              |
| 74178                                             | CT abd/pelvis without contrast, followed by contrast & further sections     |
| 74150                                             | CT abd without contrast                                                     |
| 74170                                             | CT abd without contrast, followed by contrast and further sections          |
| 76770                                             | US retroperitoneal, complete                                                |
| 76775                                             | US retroperitoneal, limited                                                 |
| 74000                                             | (KUB) radiologic examination, abdomen, single a-p view                      |
| <u>Renal function</u>                             |                                                                             |
| 80048                                             | Basic metabolic panel                                                       |
| 80069                                             | Renal function panel                                                        |
| 80053                                             | Comprehensive metabolic panel                                               |
| <u>Blood count</u>                                |                                                                             |
| 85025                                             | CBC with differential                                                       |
| 85027                                             | CBC without differential                                                    |
| 85048                                             | WBC, automated                                                              |

Abd = abdominal; CBC = complete blood count; CT = computed tomography; ICD-9-CM = International Classification of Diseases, 9<sup>th</sup> revision, Clinical Modification; KUB = kidney, ureter, bladder; US = ultrasound; WBC = white blood cell count
